# Supplementary material for: A comprehensive analysis of carotenoids metabolism in two red-fleshed mutants of Navel and Valencia sweet oranges (Citrus sinensis)
Source: PubMed Central journal article supplement (PMC9623303; doi:10.3389/fpls.2022.1034204), 2022-10-18
Supplement: DataSheet_1.pdf [file DataSheet_1.pdf]

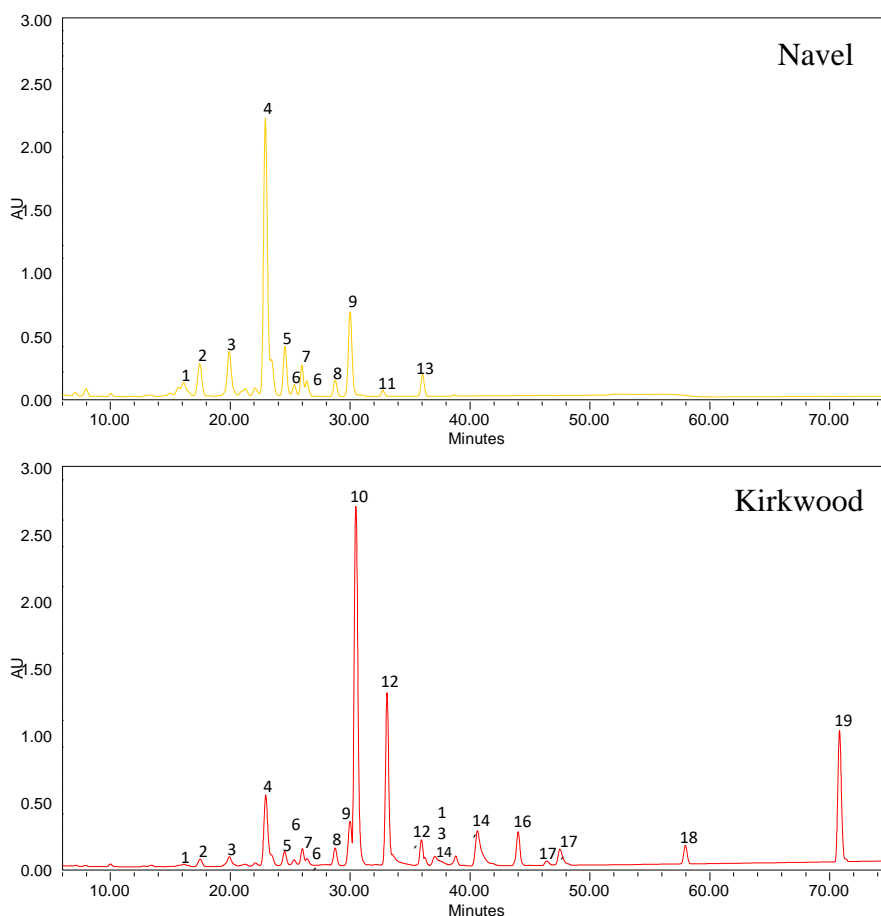

**Supplementary Figure 1.** HPLC profiles of saponified carotenoid extracts in pulp of fruit from (a) Washington Navel and (b) Kirkwood Navel Navel at full mature stage (January). All profiles are MaxPlot chromatograms (each carotenoid shown at its individual  $\lambda$  maxima). AU, Absorption units. The number peaks correspond to (1) 400-429-417; (2) All-*E*-violaxanthin; (3) Luteoxanthin; (4) 9-*Z*-violaxanthin; (5) 416-442-S; (6 and 6') Mutatoxanthin isomers; (7) Lutein; (8) Zeaxanthin; (9) Antheraxanthin; (10) Phytoene; (11)  $\alpha$ -Cryptoxanthin; (12) Phytofluene; (13)  $\beta$ -Cryptoxanthin; (14 and 14') Neurosporene isomers (15) *z*-carotene; (16)  $\beta$ -carotene; (17 and 17') *d*-carotene isomers; (18) 13-*Z*-lycopene; (19) all-*E*-Lycopene.

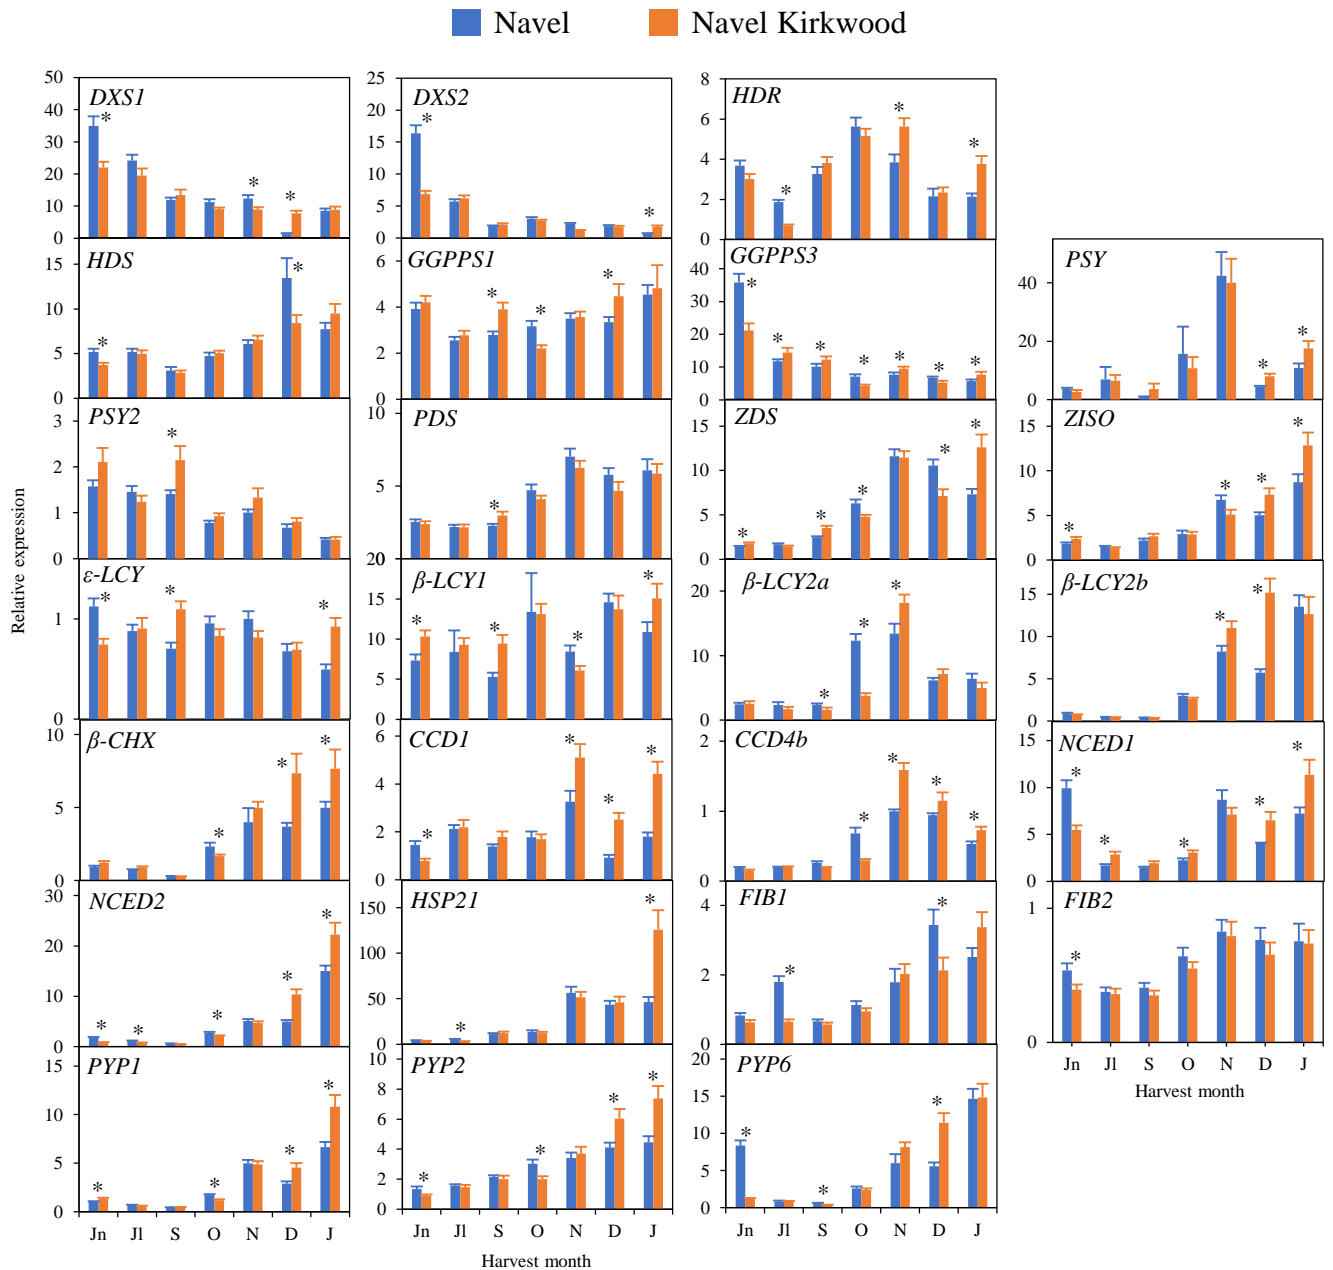

**Supplementary Figure 2.** Relative expression levels of genes of carotenoids precursors (*DXS1*, *DXS2*, *HDR*, *HDS* and *GGPPS1* and *GGPPS3*), carotenes and xanthophylls biosynthesis (*PSY*, *PSY2*, *PDS*, *ZISO*, *ZDS*, *β-LCY1*, *ε-LCY*, *β-LCY2a*, *β-LCY2b*, *β-CHX*), carotenoids catabolism (*CCD1* and *CCD4b*), ABA biosynthesis (*NCED1* and *NCED2*), carotenoid-associated proteins (*HSP21*, *FIB1* and *FIB2*) and xanthophyll esterification (*PYP1*, 2 and 6) in the flavedo of Navel and Kirkwood during fruit development and maturation. Jn, June; Jl, July; S, September; O, October; N, November; D, December; J, January. Data are the mean of three biological replicates ± SD. Asterisks indicate significant differences between genotypes by unpaired Student's t-test ( $p < 0.05$ ).

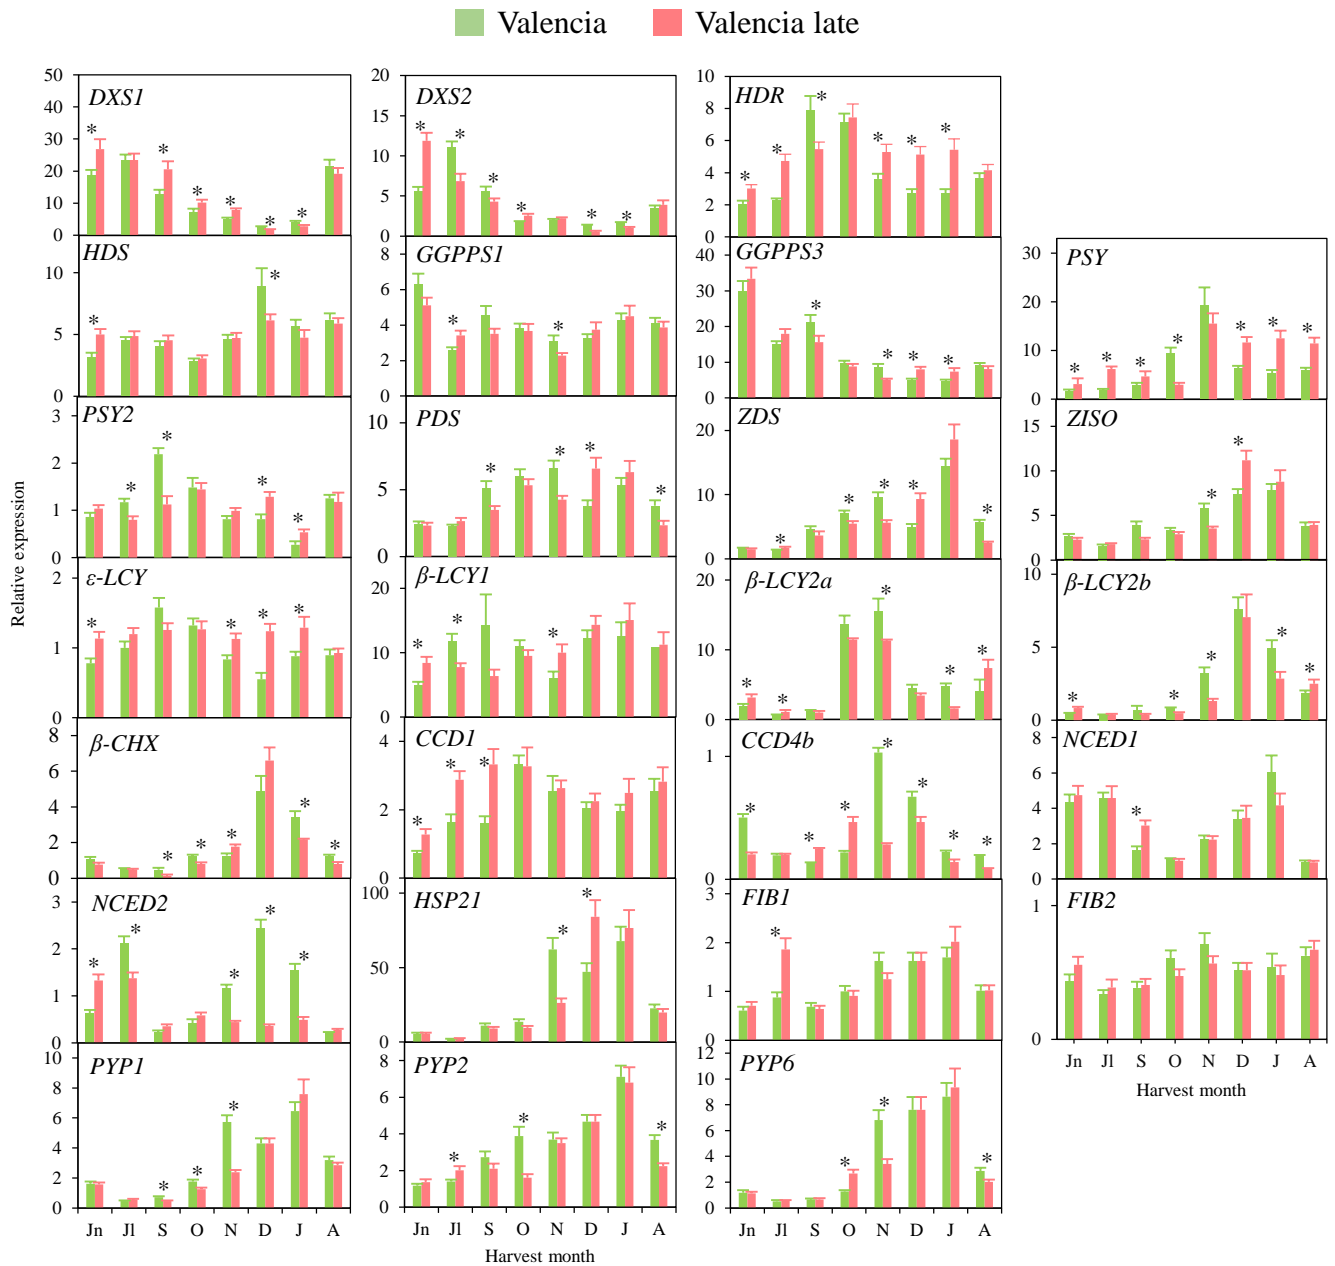

**Supplementary Figure 3.** Relative expression levels of genes of carotenoids precursors (*DXS1*, *DXS2*, *HDR*, *HDS* and *GGPPS1* and *GGPPS3*), carotenes and xanthophylls biosynthesis (*PSY*, *PSY2*, *PDS*, *ZISO*, *ZDS*,  $\beta$ -*LCY1*,  $\epsilon$ -*LCY*,  $\beta$ -*LCY2a*,  $\beta$ -*LCY2b*,  $\beta$ -*CHX*), carotenoids catabolism (*CCD1* and *CCD4b*), ABA biosynthesis (*NCED1* and *NCED2*), carotenoid-associated proteins (*HSP21*, *FIB1* and *FIB2*) and xanthophyll esterification (*PYP1*, 2 and 6) in the flavedo of Valencia and Ruby during fruit development and maturation. Jn, June; Jl, July; S, September; O, October; N, November; D, December; J, January; A, April. Data are the mean of three biological replicates  $\pm$  SD. Asterisks indicate significant differences between genotypes by unpaired Student's t-test ( $p < 0.05$ ).

**Lycopene  $\beta$ -cyclase1a ( $\beta$ -LCY1a) (GenBank Acc OP441052)**

ATGGATACTTACTCAAACCTCATAACAAGCTTGAATTCTTGCCCCAAGTTCACGGGGCTTTGGAAAAAT  
CCAGTAGTTTAAAGCTCATTGAAGATTCAGAACCAGGAGCTTAGGTTTGGTCTCAAGAAGTCTCGTCAAAA  
GAGGAATAAGAGTTGTTTCATTAAAGGCTAGTAGTAGTGTCTTTTGGAACTAGTTCCTGAAACCAAGAAG  
GAAAAATCTTGAATTTGAGCTTCCCATGTATGACCCATCAAAGGGCCTTGTGTAGACCTAGCAGTTGTCTG  
GTGGCGGCCGCTGGGCTGTGTGCTCAGCAAGTTTCAGGGCGGGGCTTTTCGGTTTGTCTCGATTGA  
TCCATCTCCCAAATGATTTGGCCAAATAATTATGGTGTGGGTGGATGAATTTGAGGCCATGGATTTG  
CTTGATTGCCTTGATACTACTTGGTCTGGTGTGTGTGCACATTGATGATAATACAAAGAAGGATCTTA  
ATAGACCTTATGGAGAGTTAATAGGAAGTTGCTGAAGTCGAAAAATGCTGCAAAAATGCATAACCAATGG  
TGTTAAGTTTACCAAGCTAAAAGTTATTAAGGTTATTCATGAAGAGTCCAAATCTTTGTTGATTTGCAAT  
GATGGTGTGACAATTCAGGCAAGCCGTGGTTCTTGATGTCTACGGGTTCTCTAGGTGTCTTGTCCAGTATG  
ATAAGCCCTATAATCCAGGTTACCAAGTGGCATATGGAATACTAGCTGAGGTAGAACAGCACCCGTTTGA  
TTTAGACAAGATGGTTTTCATGGATTGGAGAGATTCGCATCTGAACAACAATTCGAGCTCAAAGAGGCCA  
AATAGCAAAAATCTACTTTTCTTTATGCCATGCCTTTTTCGTCAAACAGGATATTTCTTGAAGAGACTT  
CGCTAGTGGCGCGGCTGGAGTGCCAATGAAAGATATCCAGGAAAGAATGGTGGCTAGATTAAGCACTT  
AGGCATAAAAAGTTAAAGCATTGAAGAGGATGAGCATTGTGTCTATCCGATGGGTGGGCCCTTCCAGTG  
CTTCTCAAAGAGTTGTTGGAATAGGTGGTACCCTGGGATGGTGCACCCCTCAACTGGCTATATGGTGG  
CAAGGACTTTAGCTGCGGCTCCTATTGTTGCAAATGCAATCGTTCGAAGCCTCAGTTCGTGACAGAAGCAT  
TTCAGGACACAAAATGTCTGCTGAAGTTTGGAAAGATTTGTGGCCATAGAAAGGAGAAGGCAAAGGGAG  
TTCTTCTGTTTGGTATGGATATCCTGTCAAACCTGACTTACCTGCCACTAGAAAGGTTTTTCGATGCTT  
TTTTTGATCTGGAGCCCGTTATTGGCATGGTTTCTTATCATCGAGATTGTTTCTCCCGAGCTTTTAGT  
TTTTGGGCTTTCTCTATTCTCACATGCCCTAATACTTCTAGGCTAGAGATCATGGCAAAGGGCACTCTT  
CCTTTGGTTAACATGATCAACAACCTTGGTACAAGATACAGATTAA

**Lycopene  $\beta$ -cyclase1b ( $\beta$ -LCY1b) (GenBank Acc OP441053)**

ATGGATACTGACTCAAACCTCATAACAAGCTTGAATTCTTGCCCCAAGTTCACGGGGCTTTGGAAAAAT  
CCAGTAGTTTAAAGCTCATTGAAGATTCAGAACCAGGAGCTTAGGTTTGGTCTCAAGAAGTCTCGTCAAAA  
GAGGAATAAGAGTTGTTTCATTAAAGGCTAGTAGTAGTGTCTTTTGGAACTAGTTCCTGAAACCAAGAAG  
GAAAAATCTTGAATTTGAGCTTCCCATGTATGACCCATCAAAGGGCCTTGTGTAGACCTAGCAGTTGTCTG  
GTGGTGGCCAGCTGGGCTGTGTGCTCAGCAAGTTTCAGAGGCGGGGCTTTTCGGTTTGTCTCGATTGA  
TCCATCTCCCAAATGATTTGGCCAAATAATTATGGTGTGGGTGGATGAATTTGAGGCCATGGATTTG  
CTTGATTGCCTTGATACTACTTGGTCTGGTGTGTGTGCACATTGATGATAATACAAAGAAGGATCTTG  
ATAGACCTTATGGAGAGTTAATAGGAAGTTGCTGAAGTCGAAAAATGCTGCAAAAATGCATAACCAATGG  
TGTTAAGTTCCACCAAGCTAAAAGTTATTAAGGTTATTCATGAAGAGTCCAAATCTTTGTTGATTTGCAAT  
GATGGTGTGACAATTCAGGCAAGCCGTGGTTCTTGATGTCTACGGGATTCTCTAGGTGTCTTGTCCAGTATG  
ATAATCCCTATAATCCAGGTTACCAAGTGGCATATGGAATACTAGCTGAGGTAGAACAGCACCCGTTTGA  
TTTAGACAAGATGGTTTTCATGGATTGGAGAGATTCGCATCTGAACAACAATTCGAGCTCAAAGAGGCCA  
AATAGCAAAAATCTACTTTTCTTTATGCCATGCCTTTTTCGTCAAACAGGATATTTCTTGAAGAGACTT  
CGCTAGTGGCGCGGCTGGAGTGCCAATGAAAGATATCCAGGAAAGAATGGTGGCTAGATTAAGCACTT  
AGGCATAAAAAGTTAAAGCATTGAAGAGGATGAGCATTGTGTCTATCCGATGGGTGGGCCCTTCCAGTG  
CTTCTCAAAGAGTTGTTGGAATAGGTGGTACCCTGGGATGGTGCACCCCTCAACTGGCTATATGGTGG  
CAAGGACTTTAGCTGCGGCTCCTATTGTTGCAAATGCAATCGTTCGAAGCCTCAGTTCGTGACAGAAGCAT  
TTCAGGACACAAAATGTCTGCTGAAGTTTGGAAAGATTTGTGGCCATAGAAAGGAGAAGGCAAAGGGAG  
TTCTTCTGTTTGGTATGGATATCCTGTCAAACCTGACTTACCTGCCACTAGAAAGGTTTTTCGATGCTT  
TTTTTGATCTGGAGCCCGTTATTGGCATGGTTTCTTATCATCGAGATTGTTTCTCCCGAGCTTTTAGT  
TTTTGGGCTTTCTCTATTCTCACATGCCCTAATACTTCTAGGCTAGAGATCATGGCAAAGGGCACTCTT  
CCTTTGGTTAACATGATCAACAACCTTGGTACAAGATACAGATTAA

**Lycopene  $\beta$ -cyclase2a ( $\beta$ -LCY2a) (GenBank Acc OP441054)**

ATGGCAACTCTTCTTAGCCGTTTTCTCTTCTCTTTAGCTAAAGTTTCGCAAATAATTGATTCAACAT  
CATCACCTTCATTTTCTCTATTTCCATTAGGCCGCCAAAATGCATGTTCAAGAAAGGCGGATCATCATCA  
TCATCACAGGATCCGGACAAGCAAGTTTGGTAACTTCTTAGAGTTGACACCGGAGTCGGTACCTGAATTC  
TTAGACTTTGATCTCCCTGGTTTTCATCCGTCCGATCGTATTCGATATGACGTGATCATCATTTGGCACTG  
GACCAAGCCGGCTCCGTCTAGCTGAGCAAGTCTCATCGCGTCATAGTCTCAAGGTATGTTGTGTTGATCC

TTCACCTCTTTCTACGTGGCCTAACAACTATGGAGTTTGGGTTGATGAGTTTGAAGACATAGGACTTGTAGACTGTTTGGACAAAACCTGGCCGATGACTTGTGTTTTTATTAATGATCACAAGACCAAGTATCTAGACAGGCCCTACGGTCGTGTAGTAGAAAATATTTTGAAGACAAAGTTATTAGAGAATTGTGTTTCAAATGGAGTTAAAGTTTCATAAGGCTAAAAGTTGGCACGTGAATCATCAGGAGTTCGAGTCTTCGATTGTTTGTGATGATGGAAATGAGATTAAGGCTAGCTTGATTGTTGATGCTAGTGGCTTTGCTAGTAGTTTTGTTGAGTATGATAAGCCAAGAAACCATGGATAACCAAATTGCTCATGGGATTTTAGCTGAGGTTGAGAGTCACCCTTTTGATTTAGACAAAATGGTTCTCATGGATTGGAGAGATTCCCATTTAGGGAATGAGCCTTACTTGCAGCTAGCAATTGAAGCTCCCAACTTTTCTCTATGCAATGCCATTTGATTCAAATTTGGTATTTTTAGAAGAAACATCTTTGGTTAGTAGGCCAGTTTTGTTCATATAAAAGAGGTTAAGAGCAGAATGGCAGCGAGGTTAAGGCATATGGGAATTAGAGTTAAAAGAGTGATTGAAGATGAAAAATGTTTGGATTCCAATGGGAGGTCCTCTGCCTGTGATCCACAAAAGTGTGATGGCTATTGGCCGACAGTCTGGTTTTAATCCATCCTCAACTGGGTATATGGTGGCTCGAACCATGGCTCTGGCCCCCTGCCTTGGCTGATGCAATAGCTGAATGCCTTGGCTCAACCAGGATGATCAGAGGCAGGCCACTTCATCAGAAAAGTGTGGAATGGGTTGTGGCCAATTGACAGAAGATGCAATAGGGAGTTTATTCAATTTGGTATGGAGACTTTGTTGAAGCTGGATTTGAAGGGGACTAGGAGATTCTTTGATGCTTTCTTTGATTTGAATCCTTACTACTGGCATGGGTTTCTGTCCCTCAAGGTTGTCTCTTGCAGAGCTTGCTGGCCCTAAGCTTGTCTCTTTGGACACGCCTCGAATTTCTTCCAGGTTGATATTGTTACCAAGTGCCCTGTTCCCTCTGGTTAAAATGATGGGGAATCTTGCCCTTGAACCATTGTA

### Lycopene $\beta$ -cyclase2b ( $\beta$ -LCY2b) (GenBank Acc OP441055)

ATGGCAACTCTTCTAGCCCGTTTTCTCCTTCTCCTTTAGCTAAAAGTTTCGCAAATAATTGATTCAACATCATCACAATTCATTTTCCTATTTCCATTAGGCCGCCAAAATGCATGTTCAAGAAAGGCGGATCATCATCATCATCACAGGATCCGGACAAGCAAGTTTGGTAACTTCCTAGAGTTGACACCGGAGTCGGAACCTGAATTCCTTAGTCTTTGATCTCCCTGGTTTTCATCCGTCCGATCGTATTTCGATATGACGTGATCATCATTGGCACTGGACCTGCCGGCTCCGTCTAGCTGAGCAAGTCTCATCGCGTCATCGTATCAAGGTATGTTGTGTTGATCCTTCACCTCTTTCTACGTGGCCTAACAACTATGGAGTTTGGGTTGATGAGTTTGAAGACATAGGACTTATAAGACTGTTTGGACAAAACCTGGCCGATGACTTGTGTTTTTATTAATGATCACAAGACCAAGTATCTAGACAGGCCCTACGGTCGTGTAGTAGAAAATATTTTGAAGACAAAGTTATTAGAGAATTGTGTTTAAATGGCGTTAGGTTTCATAAGGCTAAAAGTTGGCACGTGAATCATCAGGAGTTCGAGTCTTCGATTGTTTGTGATGATGGAAATGAGATTAAGGCTAGCTTGATTGTTGATGCTAGTGGCTTTGCTAGTAGTTTTGTTGAGTATGATAAGCCAAGAAACCATGGATAACCAAATTGCTCATGGGATTTTAGCTGAGGTTGAGAGTCACCCTTTTGATTTAGATAAAAATGGTTCTCATGGATTGGAGAGATTCCCATTTAGGGAATGAGCCTTACTTGCAGCTAGCAATTGAAGCTCCCAACTTTTCTCTATGCAATGCCATTTGATTCAAATTTGGTATTTTTAGAAGAAACATCTTTGGTTAGTAGGCCAGTTTTGTTCATATAAAAGAGGTTAAGAGAGAATGGCAGCGAGGTTAAGGCATATGGGAATTAGAGTTAAAAGAGTGATTGAAGATGAAAAATGTTTGGATTCCAATGGGAGGTCCTCTGCCTGTGATCCGCAAAGTGTGATGGCTATTGGCTGCACAGTCTGGTTTTAGTCCATCCTCAACTGGGTATATGGTGGCTCGAACCATGGCTCTGGCCCCCTGCCTTGGCTGATGCAATAGCTGAATGCCTTGGCTCAACCAGGATGATCAGAGGCAGGCCACTTCATCAGAAAAGTGTGGAATGGGTTGTGGCCAATTGACAGAAGATGCAATAGGGAGTTTATTCAATTTGGTATGGAGACTTTGTTGAAGCTGGATTTGAAGGGGACTAGGAGATTCTTTGATGCTTTCTTTGATTTGAATCCTTACTACTGGCATGGGTTTCTGTCCCTCAAGGTTGTCTCTTGCAGAGCTTGCTGGCCCTAAGCTTGTCTCTTTGGACACGCCTCGAATTTCTTCCAGGTTGATATTGTTACCAAGTGCCCTGTTCCCTCTGGTTAAAATGATGGGGAATCTTGCCCTTGAACCATTGTA

### Lycopene $\epsilon$ -cyclase a ( $\epsilon$ -LCYa) (GenBank Acc OP441056)

ATGGAATACTACTGTCTTGGAGCTCGAAAATTTTCGAGCAATGGCGGTATCTCCTTTCCCAACAGGGCGGCGCGAAGGAAAAGCACTGAGAGTGAAACCAAACAGAGTGTGTAGATTGTAATCATAGTTCCCTATAAAGTGACAGCTAGAGCTACTAGTAAATAATGCTGGTAGTGAGAGTTGCGTAGCCGTCAAAGAAGAAGATTATATTAAAGCCGGTGGCTCTCAGCTTGTTCGTACAAATGCAGCAAACAAGTCAATGGATAAACAGTCTAAATTAGCCGATAAGCTACCGCAATATCAATTTGGTAATGGTATTTTGGATTTGGTGGTATTGGTTGTGGCCAGCTGGTCTTGTCTTGGCTGCAGAATCAGCGAAGTTGGGATTAATGTTGGACTTATTGGCCCGGATCTCCCTTTCACAAAACAATATGGTGTGTGGGAAGATGAATTTAGAGATCTTGGACTTGAAGGGTGTATCGAACATGTCTGGAGAGACACAGTTGTATATATGATGAAGATGAACCCATCTTGATTGGTCTGCTTATGGACGAGTTAGTCGACATTTGCTTCATGAAGAATTATTAAGAAGGTGTGTCGAGTCAGGTGTTTCATATCTTAGCTCAAAGTGGAAAGCATTACGGAATCTACCAGTGGTCATCGTCTTGTAGCTTGTGAACATGATATGATTG



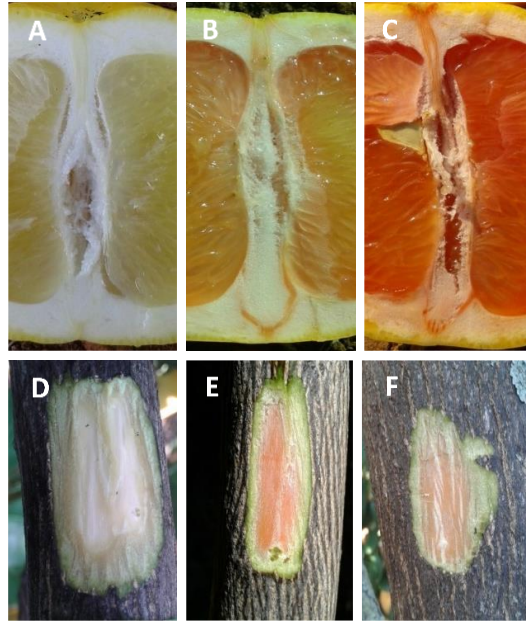

**Supplementary Figure 5.** Representative pictures of longitudinal sections of Marsh (A), Rio Red (B) and Star Ruby (C) grapefruits, and trunks of Marsh (D), Rio Red (E) and Star Ruby (F) grapefruit trees growing at the Citrus Germoplasm of the IVIA (Moncada, Valencia, Spain). Note the red colour of the notch and vascular axis of the fruit, and distinctive pigmentation of the inner bark and wood for each variety.
